# Supplementary material for: The group trend of lanthanides binding to DNA and DNAzymes with a complex but symmetric pattern
Source: Royal Society of Chemistry journal article supplement (doi:10.1039/c4cc05551a), 2014-08-12
Supplement: c4cc05551a1.pdf [file c4cc05551a1.pdf]

## Supplementary Information

### **Group trend of lanthanides binding to DNA and DNazymes with a complex but symmetric pattern**

Wei Ting David Lin, Po-Jung Jimmy Huang, Rachel Pautler and Juewen Liu\*

*Department of Chemistry, Waterloo Institute for Nanotechnology,  
University of Waterloo, Waterloo, Ontario, N2L 3G1, Canada.*

*Fax: 519 7460435;*

*Tel: 519 8884567 Ext. 38919;*

*E-mail: liujw@uwaterloo.ca.*

## Materials and Methods

All the DNA sequences were purchased from Eurofin Genomics. The stock DNA solutions were prepared in 5 mM HEPES, pH7.6. Metal chlorides were purchased from Sigma-Aldrich and their solutions were prepared using Milli-Q H<sub>2</sub>O. Denaturing gel loading dye was from New England BioLabs Inc. All the gel running reagents were from Bio Basics Inc.

**DNAzyme complex preparation.** The DNAzyme complex (with non-cleavable Sub-dA substrate) was prepared by dissolving the substrate and enzyme strands (1  $\mu$ M each) in buffer A (25 mM NaCl, 50 mM MES, pH6.0). The complex was then annealed by heating to 80 °C and cooling to ambient room temperature. The samples were then frozen overnight.

**Luminescence.** 500  $\mu$ L DNAzyme complex solution (1  $\mu$ M) was combined with 5  $\mu$ L Tb<sup>3+</sup> or competing ions (10 mM). The samples were incubated overnight at ambient room temperature to allow for competitive binding to reach equilibrium. The sensitized Tb<sup>3+</sup> emission was measured using a fluorometer (FluoroMax-4, Horiba Scientific) by exciting at 290 nm. Peak high at 543 nm was quantified.

**Tb<sup>3+</sup> luminescence lifetime.** The DNAzyme complex solution was dried using centrifugal evaporator (Vacufuge Plus, Eppendorf). The residual DNAzyme and selection buffer salt was dissolved in D<sub>2</sub>O to the same concentration (1  $\mu$ M DNAzyme complex, 25 mM NaCl 50 mM MES, pH 6.0). TbCl<sub>3</sub> solution was added to both H<sub>2</sub>O and D<sub>2</sub>O samples to a final concentration of 100  $\mu$ M. Samples were incubated overnight. For lifetime measurement, the samples were maintained at 23 °C. Luminescence decay was measured by exciting sample at 290 nm (slit width 5nm) on a Varian Eclipse instrument for 20 ms (emission 543 nm, gate time 0.0200 ms, 50 iterations). The traces were fitted to first-order decay exponential and the decay constant was used to determine H<sub>2</sub>O coordination number. The number of coordinated water  $q$  is calculated using  $q = A(1/\tau_{H_2O} - 1/\tau_{D_2O})$ , where  $A$  is 4.2 for Tb<sup>3+</sup> and  $\tau$  is the lifetime.<sup>S1</sup>

**Terbium<sup>3+</sup> binding curve.** To measure  $K_d$ , 1  $\mu$ M DNAzyme complex was prepared in buffer B (25 mM NaCl, 10 mM MgCl<sub>2</sub> 50 mM MES, pH6.0). 200  $\mu$ L of the DNAzyme *complex* was placed in a quartz cuvette. Its luminescence intensity was measured as a function of Tb<sup>3+</sup> concentration with an incubation time of 2 min after each Tb<sup>3+</sup> addition.

**Activity assay.** Ce13d activity in the presence of 10  $\mu$ M different lanthanides were carried out in buffer A with 1  $\mu$ M DNAzyme (using the cleavable Sub-rA substrate). After 1 h of reaction, the samples were analyzed by polyacrylamide gel electrophoresis. The gel was imaged using on a ChemiDoc™ MP imaging system (Bio-Rad)

## Additional references

- S1. A. L. Feig, M. Panek, W. D. Horrocks, Jr and O. C. Uhlenbeck, *Chem. Biol.*, 1999, **6**, 801-810.
